# Supplementary material for: Genetics Variants in the Epoxygenase Pathway of Arachidonic Metabolism Are Associated with Eicosanoids Levels and the Risk of Diabetic Nephropathy
Source: MDPI journal article supplement (doi:10.3390/jcm10173980), 2021-09-02

Supplementary materials

**Table S1.** Influence of polymorphisms in the epoxygenase pathway on the plasma and urinary levels of vasoactive eicosanoids shown by subjects with normal renal function.

| Polymorphism  | Genotype      | 14,15-DHET (ng/L) |       | 11,12-DHET (ng/L) |       | 20-HETE (ng/L) |       | 20-HETE ng/ mg Cr |       |
|---------------|---------------|-------------------|-------|-------------------|-------|----------------|-------|-------------------|-------|
|               |               | Mean              | SE    | Mean              | SE    | Mean           | SE    | Mean              | SE    |
| CYP2C8 *1/*3  | *1/*1         | 526.55            | 27.02 | 279.87            | 12.49 | 309.72         | 16.33 | 9.75              | 02.04 |
|               | *1/*3 y 3*/*3 | 610.84            | 62.1  | 296.37            | 19.28 | 314.61         | 20.94 | 15.87             | 4.73  |
| CYP2J2 *1/*7  | *1/*1         | 539.12            | 26.77 | 281.24            | 11.22 | 311.2          | 14.28 | 11.47             | 2.12  |
|               | *1/*7-*/7/*7  | 635.93            | 91.24 | 311.71            | 28.05 | 308.93         | 31.16 | 9.97              | 3.98  |
| CYP4F2 V433M  | VV            | 563.67            | 42.78 | 278.72            | 15.31 | 294.72         | 19.01 | 12.58             | 3.51  |
|               | VM-MM         | 538.35            | 32.25 | 287.75            | 14.26 | 321.57         | 17.99 | 10.48             | 2.27  |
| CYP4A11 F433S | FF            | 549.58            | 29.64 | 281.19            | 12.95 | 302.16         | 16.4  | 12.85             | 2.86  |
|               | FS-SS         | 545.94            | 49.62 | 289.88            | 18.08 | 328.08         | 22.4  | 8.3               | 1.29  |
| EPHX2 R287Q   | RR            | 547.27            | 28.7  | 283.26            | 11.75 | 303.39         | 13.72 | 9.43              | 1.14  |
|               | RQ-QQ         | 553.56            | 58.49 | 288.56            | 23.46 | 348.04         | 39.51 | 20.94             | 10.33 |
| EPHX2 3'UTR   | A/A           | 529.21            | 32.24 | 275.66            | 14.18 | 290.57         | 15.69 | 11.94             | 2.66  |
|               | A/G y G/G     | 571.82            | 41.58 | 294.47            | 15.65 | 336.03         | 22.04 | 10.53             | 2.87  |
| EPHX2 K55R    | KK            | 538.4             | 28.24 | 283.36            | 11.9  | 300.72         | 14.21 | 11.88             | 2.42  |
|               | KR-RR         | 584.06            | 61.12 | 287.03            | 22.63 | 347.84         | 32.59 | 9.36              | 2.24  |

Figure S1. Epoxygenase pathway of arachidonic acid metabolism.

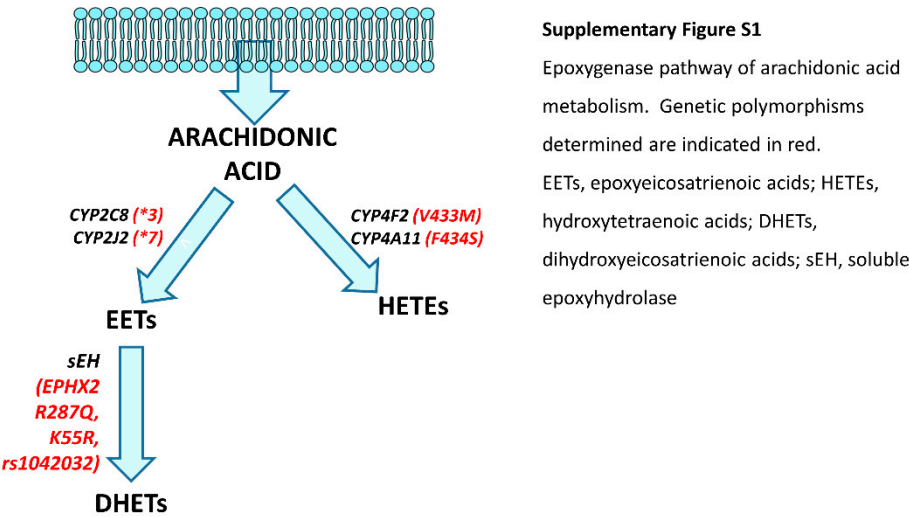

Figure S2: Cumulative event-free survival for patients with diabetic kidney disease according to the different genotypes considered

**Supplementary Figure S2 (I).** Cumulative event-free survival for patients with diabetic Kidney disease according to the different genotypes considered

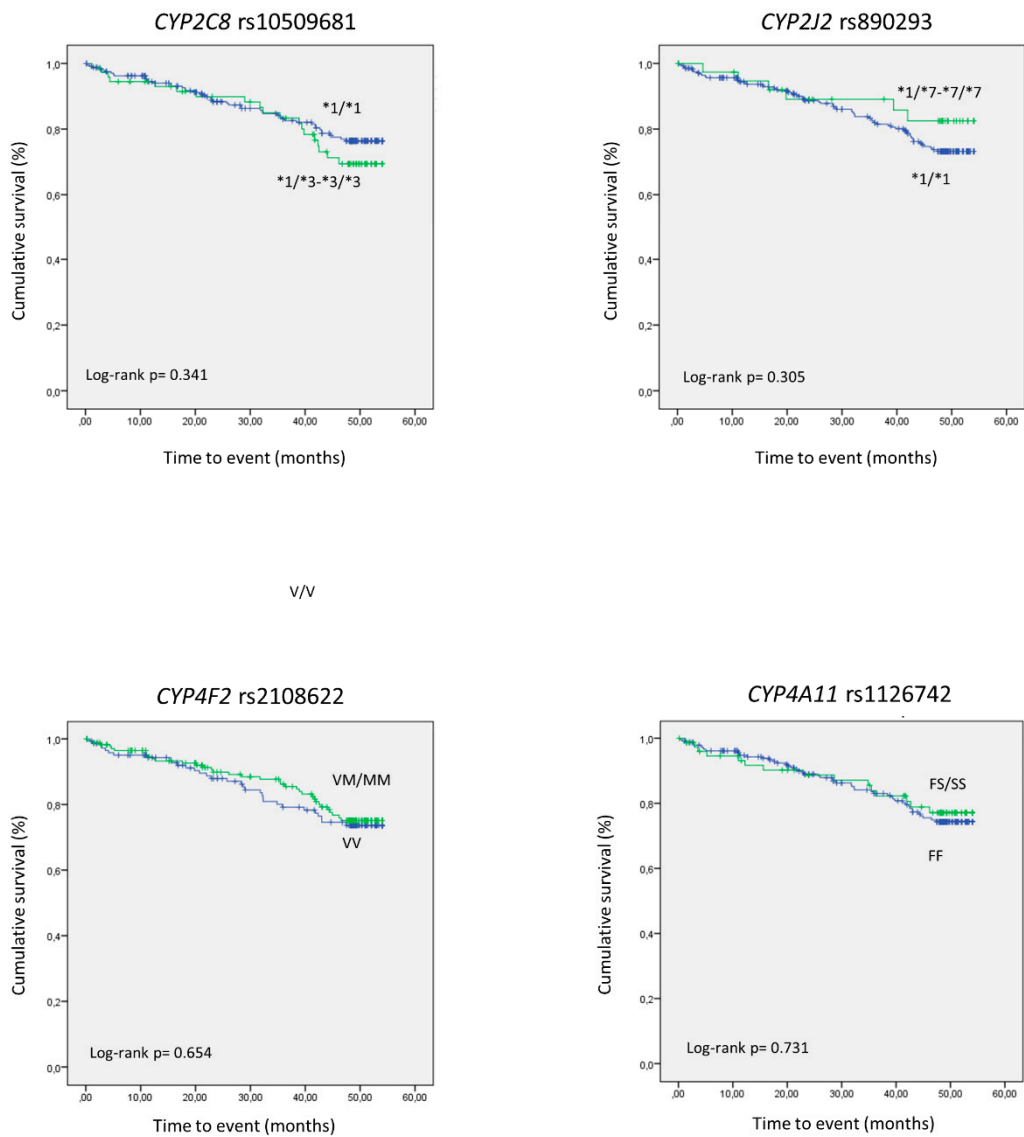

**Supplementary Figure S2 (II).** Cumulative event-free survival for patients with diabetic Kidney disease according to the different genotypes considered

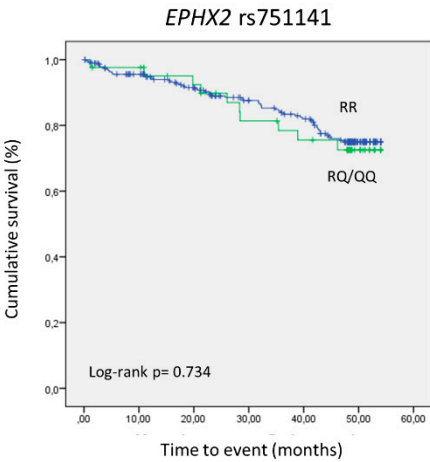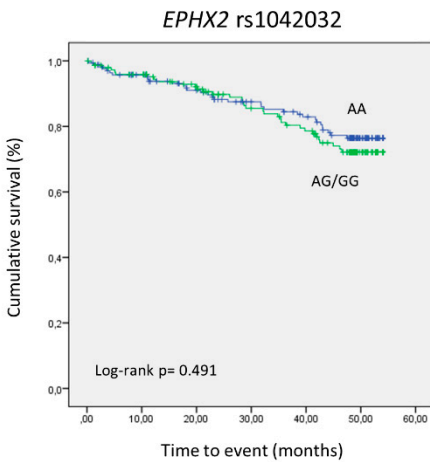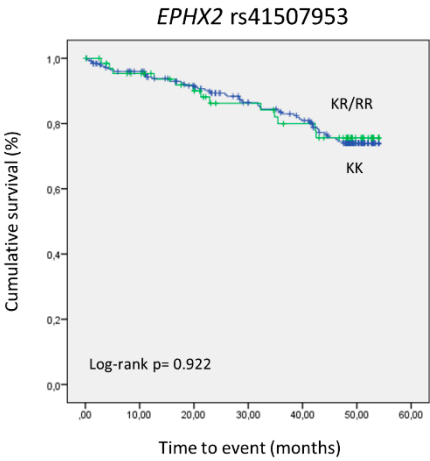

Supplement: s1 [file s1]
